# Supplementary material for: Biomolecular Condensates in Myeloid Leukemia: What Do They Tell Us?
Source: PubMed Central journal article supplement (PMC10306439; doi:10.1097/hs9.0000000000000923), 2023-06-27
Supplement: hs9-7-e923-s001.pdf [file hs9-7-e923-s001.pdf]

**Supplementary Table 1: Reported AML-associated biomolecular condensates**

| Disease   | Gene products                        | IDRs                                       | Visualization                          | Condensate components                                                                          | Methodology                    | Cell (lines)                                                                   | Overexpression/endogenous                              | Mouse models                           | Refs.                     |
|-----------|--------------------------------------|--------------------------------------------|----------------------------------------|------------------------------------------------------------------------------------------------|--------------------------------|--------------------------------------------------------------------------------|--------------------------------------------------------|----------------------------------------|---------------------------|
| AML, MDS  | NUP98-r<br>NUP98-NSD1<br>NUP98-HOXA9 | FG repeat                                  | confocal microsc.<br>confocal microsc. | 157 common interactors<br>EP300, XPO1, SMARCA5 <i>et al.</i><br>KMT2A, WDR5, MOF <i>et al.</i> | Proteomics<br>Proteomics       | No human AML cell line<br>Mouse primary HSPC, 293T<br>Mouse primary HSPC, 293T | Retroviral overexpression<br>Retroviral overexpression | BM reconstitution<br>BM reconstitution | [57]<br>[60] [62]<br>[58] |
| AML, tAML | KMT2A-r                              | AHC domain                                 | confocal microsc.                      | MEN1, DOT1L, LEDGF, PAF1C, <i>et al.</i>                                                       | Proteomics                     | THP1, NOMO1, MOLM13, MV4-11                                                    | Retroviral overexpression & endogenous                 | Transgenic & BM reconstitution         | [71] [72] [73]            |
| APL       | PML-RARA                             | *RBCC                                      | confocal microsc.                      | UBC9, SUMO1/2/3...                                                                             | Immunoprecipitation            | NB4                                                                            | Endogenous proteins                                    | Transgenic & BM reconstitution         | [78] [80]                 |
| AML       | NPM1c                                | A2-3, B1-2                                 | confocal microsc.                      | KMT2A, ENL, AF4, AF9 <i>et al.</i>                                                             | LacO-array assay               | OCI-AML3                                                                       | Endogenous proteins                                    | BM reconstitution & PDX*               | [84] [89] [90]            |
| AML, tAML | MN1                                  | Poly-Glu strain                            | confocal microsc.                      | SMARCA4, SMARCC1, ARID1A...                                                                    | Proteomics                     | UCSD-AML1, MUTZ-3, AMU-AML1                                                    | Endogenous proteins                                    | BM reconstitution                      | [11]                      |
| AML       | YTHDC1                               | Glu-rich (N-term.), Arg/Pro-rich (C-term.) | confocal microsc.                      | m6A modified RNA, YTHDC1...                                                                    | <i>In vitro</i> reconstitution | THP1, NOMO1, MOLM13, OCI-AML3, KASUMI1                                         | Endogenous proteins                                    | BM reconstitution & PDX*               | [12] [98]                 |

\* The RBCC domains (RING finger domain (R) followed by two cysteine-histidine-rich B-box domains (B) and an alpha-helical coiled-coil domain (CC)) XXX

\* Patient-derived xenograft
