# Supplementary material for: Biomolecular Condensates in Myeloid Leukemia: What Do They Tell Us?
Source: PubMed Central journal article supplement (PMC10306439; doi:10.1097/hs9.0000000000000923), 2023-06-27
Supplement: hs9-7-e923-s002.pdf [file hs9-7-e923-s002.pdf]

Jevtic, Allram et al., Supplementary Table 2

| Methods                         | Description                                                                                                                                                                                                                                                                                                                  | References: Digital Object Identifier (DOI):                                                            |
|---------------------------------|------------------------------------------------------------------------------------------------------------------------------------------------------------------------------------------------------------------------------------------------------------------------------------------------------------------------------|---------------------------------------------------------------------------------------------------------|
| <b>Fluorescence microscopy</b>  | Tracking <i>in vitro</i> reconstituted condensates (droplets) over time and testing their formation, dissolution kinetics, mechanistic properties in various physico-chemical conditions. <i>In vivo</i> condensates can be analyzed using single-molecule assays to determine the stoichiometry of condensate constituents. | <a href="https://doi.org/10.1016/j.tibs.2020.05.011">https://doi.org/10.1016/j.tibs.2020.05.011</a>     |
| <b>Biochemical assays</b>       | Identification of protein and RNA constituents within biomolecular condensates by using combined proteomic profiling and DNA/RNA-seq. Crosslinking assays can be used to identify protein-protein and protein-RNA interactions.                                                                                              | <a href="https://doi.org/10.1016/j.iprot.2012.04.030">https://doi.org/10.1016/j.iprot.2012.04.030</a>   |
| <b>Optogenetic approaches</b>   | Analyzing the biophysical properties of biomolecular condensates by fusing the photolyase homology region (PHR) domain of the <i>Arabidopsis thaliana</i> cryptochrome 2 (CRY2) to various IDR domains, enabling inducible and reversible condensation in living cells.                                                      | <a href="https://doi.org/10.1002/wsbm.1415">https://doi.org/10.1002/wsbm.1415</a>                       |
| <b>NMR spectroscopy</b>         | Acquiring atomic-resolution view on intra/interprotein interactions over various timescales providing the information on domain/loop motions of <i>in vitro</i> reconstituted condensates.                                                                                                                                   | <a href="https://doi.org/10.1042/EBC20220056">https://doi.org/10.1042/EBC20220056</a>                   |
| <b>Microfluidics</b>            | Generating and high-throughput screening of thousands of well-defined microcompartments within a short time. Condensate composition can be manipulated by introducing additional molecules.                                                                                                                                  | <a href="https://doi.org/10.1016/j.bbamcr.2020.118823">https://doi.org/10.1016/j.bbamcr.2020.118823</a> |
| <b>Cryo-electron tomography</b> | Visualizing the condensate network in 3D with nanometer resolution through repeating, aligning, and averaging acquired structures.                                                                                                                                                                                           | <a href="https://doi.org/10.1016/j.devcel.2020.09.003">https://doi.org/10.1016/j.devcel.2020.09.003</a> |
